# Supplementary material for: Bioactive Compounds and Stability of a Typical Italian Bakery Products “Taralli” Enriched with Fermented Olive Paste
Source: PubMed Central journal article supplement (PMC6766877; doi:10.3390/molecules24183258), 2019-09-06
Supplement: molecules-24-03258-s001.pdf [file molecules-24-03258-s001.pdf]

**Figure S1.** HPLC chromatogram of polyphenol extracts from Taralli CTRL, OPC and OPL. Samples were recorded with DAD at 278 nm. Peak numbers: 1, Hydroxytyrosol; 2, Tyrosol; 3, Verbascoside; 4, Oleacin; 5, Isoverbascoside; 6, Oleocanthal.

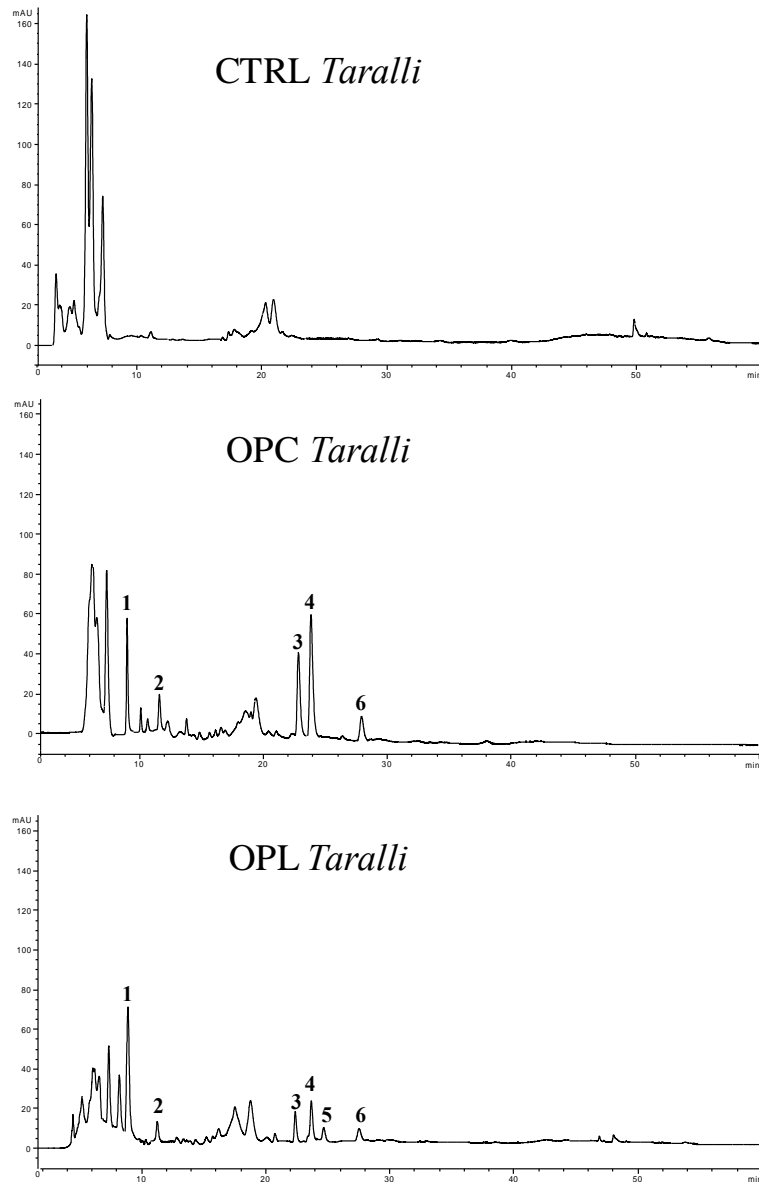

**Table S1.** Polyphenols composition of virgin olive oil from Cellina di Nardò and Leccino olive cultivars.

|                            | Cellina di Nardò  | Leccino           |
|----------------------------|-------------------|-------------------|
|                            | mg/100g           |                   |
| Hydroxytyrosol (3,4-DHPEA) | 0.26±0.08         | 0.42±0.001        |
| Tyrosol (p-HPEA)           | 1.38±0.05         | 0.38±0.03         |
| Oleuropein                 | 47.08±2.44        | 9.52±0.86         |
| Quercetin                  | 4.74±0.14         | 3.05±0.29         |
| Pinoresinol                | nd                | 0.11±0.001        |
| <i>Total</i>               | <i>53.46±2.71</i> | <i>13.48±1.18</i> |

Significance: nd, not detected. Data represent the mean ± standard deviation of three replicate measurements (n = 3).
